# Supplementary material for: Structural basis for sarcolipin’s regulation of muscle thermogenesis by the sarcoplasmic reticulum Ca2+-ATPase
Source: PubMed Central journal article supplement — Sci Adv. 2021 Nov 26;7(48):eabi7154. doi: 10.1126/sciadv.abi7154 (PMC8626070; doi:10.1126/sciadv.abi7154), 2021-11-26
Supplement: sciadv.abi7154_sm.pdf [file sciadv.abi7154_sm.pdf]

Supplementary Materials for  
**Structural basis for sarcolipin's regulation of muscle thermogenesis by the sarcoplasmic reticulum  $\text{Ca}^{2+}$ -ATPase**

Songlin Wang, Tata Gopinath, Erik K. Larsen, Daniel K. Weber, Caitlin Walker, Venkateswara Reddy Uddigiri, Kaustubh R. Mote, Sanjaya K. Sahoo, Muthu Periasamy, Gianluigi Veglia\*

\*Corresponding author. Email: [vegli001@umn.edu](mailto:vegli001@umn.edu)

Published 26 November 2021, *Sci. Adv.* 7, eabi7154 (2021)

DOI: [10.1126/sciadv.abi7154](https://doi.org/10.1126/sciadv.abi7154)

**This PDF file includes:**

Figs. S1 to S7

Table S1

|                  | SERCA <sup>W932C</sup><br>SLN <sup>L8C</sup> |   |   |   | SERCA <sup>S936C</sup><br>SLN <sup>L8C</sup> |   |   |   | SERCA <sup>WT</sup><br>SLN <sup>E7C</sup> |   |
|------------------|----------------------------------------------|---|---|---|----------------------------------------------|---|---|---|-------------------------------------------|---|
| Ca <sup>2+</sup> | -                                            | + | - | + | -                                            | + | - | + | -                                         | + |
| ATP              | +                                            | + | - | - | +                                            | + | - | - | +                                         | + |
| AMPPCP           | -                                            | - | + | + | -                                            | - | + | + | -                                         | - |

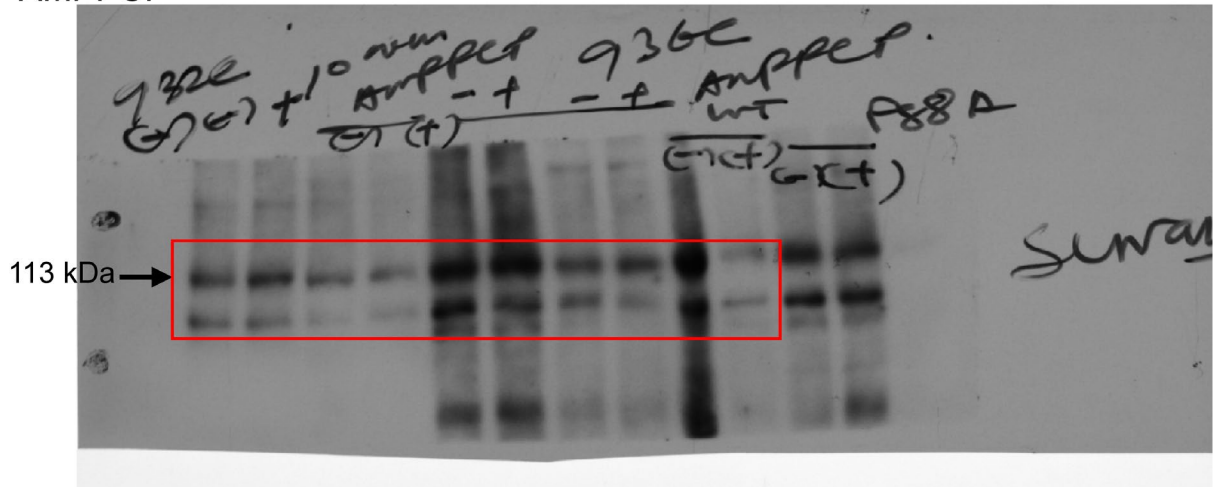

**Fig. S1.** The full gel image of the cross-linking of SLN<sup>L8C</sup> with SERCA<sup>W932C</sup> or SERCA<sup>S936C</sup>, and SLN<sup>E7C</sup> with SERCA<sup>WT</sup> at different conditions. The red square highlights the region we show in Fig. 2G.

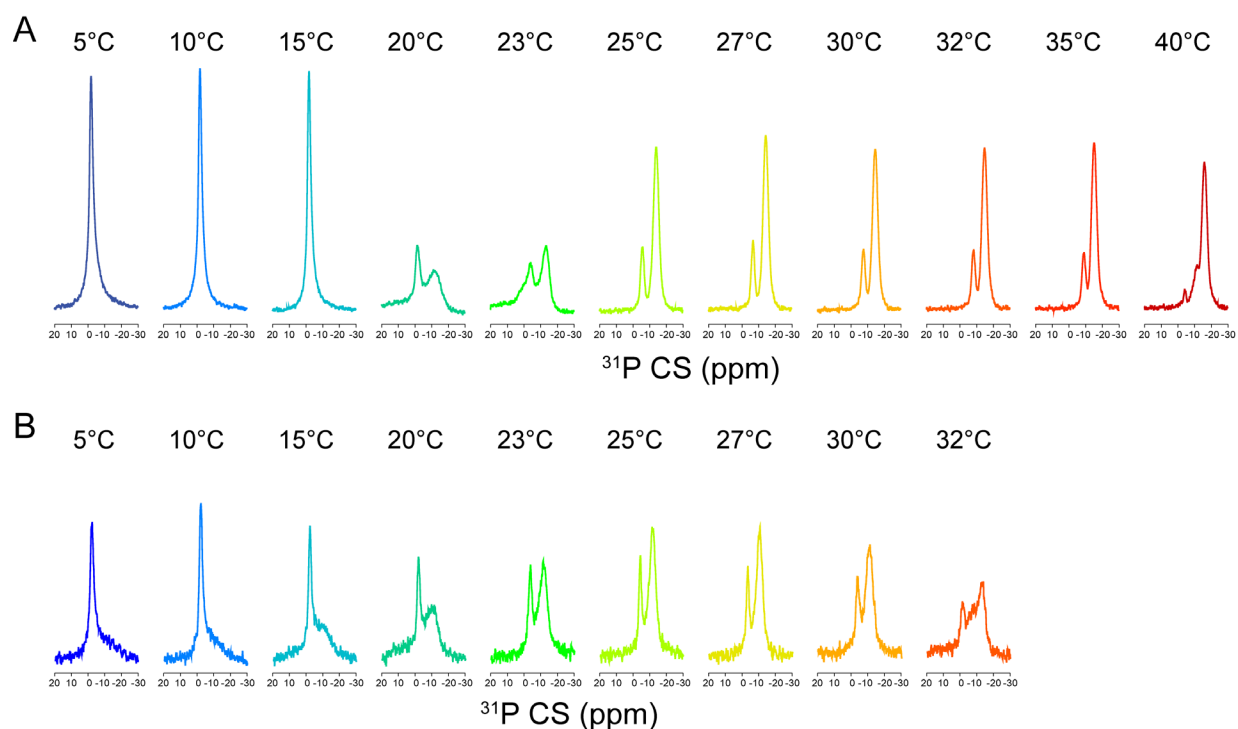

**Fig. S2. Monitoring the uniform alignment of the lipid bicelles in magnetic field containing free SLN and the SERCA/SLN complex.** One-pulse  $^{31}\text{P}$  NMR spectra acquired at different temperatures for bicelles with (A) free SLN, and (B) the SERCA/SLN complex. A 50 kHz SPINAL  $^1\text{H}$  decoupling was applied during the data acquisition for better resolution. The temperature ranges ideal for the alignment of the lipid bicelles were 24-39°C and 23-31°C for bicelles containing free SLN and the SERCA/SLN complex, respectively. The variable temperature unit was set to 20°C during the execution of the hcSE-SAMPI4 experiments for all SERCA/SLN samples, corresponding to a sample temperature of 26°C as monitored by the  $^1\text{H}$  chemical shift of the  $\text{H}_2\text{O}$  signal.

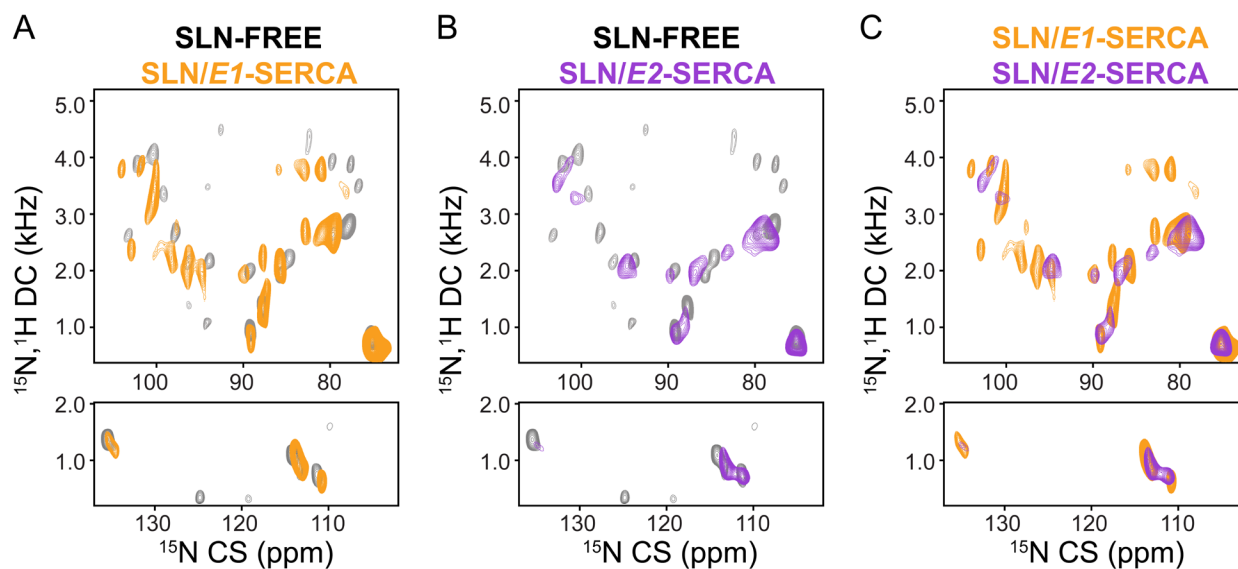

**Fig. S3. The comparison of hcSE-SAMPI4 spectra of free SLN, SLN/*E1*-SERCA complex, and SLN/*E2*-SERCA complex.** (A) The overlay of hcSE-SAMPI4 spectra of free SLN (grey) and SLN/*E1*-SERCA (orange). (B) The overlay of hcSE-SAMPI4 spectra of free SLN (grey) and SLN/*E2*-SERCA (purple). (C) The overlay of hcSE-SAMPI4 spectra of SLN/*E1*-SERCA (orange) and SLN/*E2*-SERCA (purple).

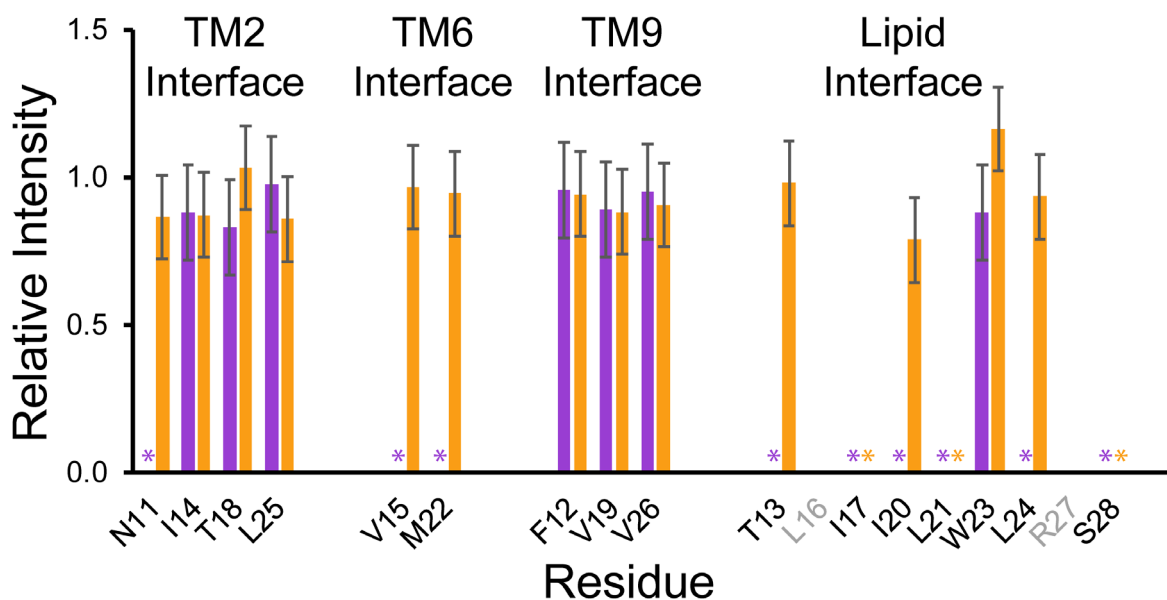

**Fig. S4.** The analysis of relative peak intensity of SLN upon binding to  $\text{Ca}^{2+}$  free E2 state (purple) and  $\text{Ca}^{2+}$  bound E1 state (orange) of SERCA. The peak intensities are normalized by a standard peak to eliminate the uncertainty caused by the variation of the amount of sample. The resonance peak of R6<sub>sc1</sub> is chosen as the standard peak because it is narrow and intense in both spectra and R6 locates at the SLN/lipid interface thus barely affected by SERCA binding. The residues are organized by the interfaces. The purple or orange asterisks represent the residues which peaks do not appear in the spectrum of E2-SERCA or E1-SERCA, respectively. The error bars represent the noise level of the spectra. Note that L16 and R27 are excluded due to overlap.

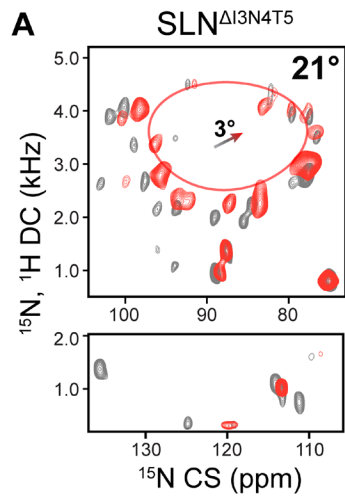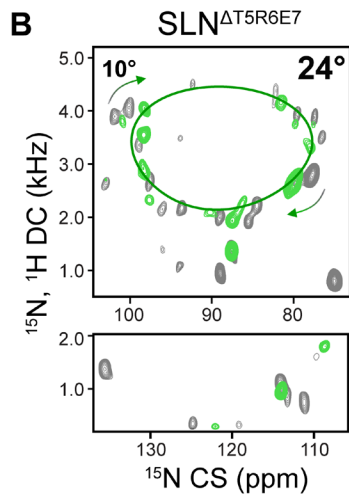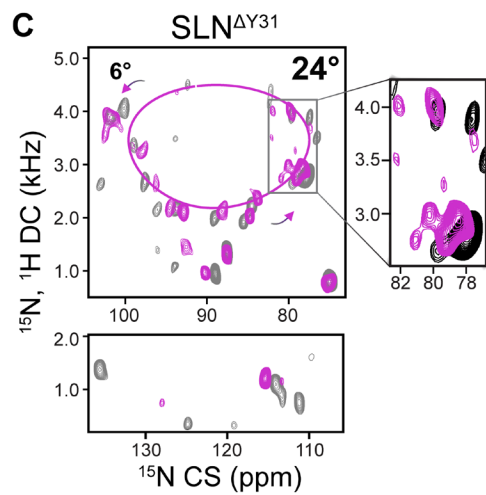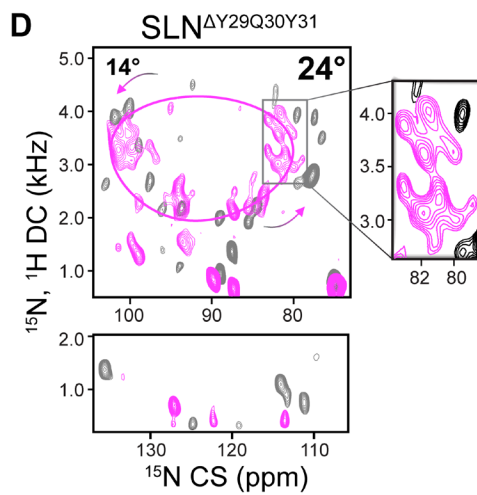

**Fig. S5. Effects of N-, C-terminal and domain Ib deletions on SLN topology.** hcSE-SAMPI4 spectra of SLN<sup>ΔI3N4T5</sup> (A), SLN<sup>ΔT5R6E7</sup> (B), SLN<sup>ΔY31</sup> (C), and SLN<sup>ΔY29Q30Y31</sup> (D). The hcSE-SAMPI4 spectrum of SLN<sup>wt</sup> is shown in grey as a reference. The arrows indicate the orientational changes of the SLN topology for the different variants. The spectral insets show multiple populations for selected resonances upon deletion of the C-terminal residues. Cartoon representation of the topological changes of SLN variants is shown below each spectrum.

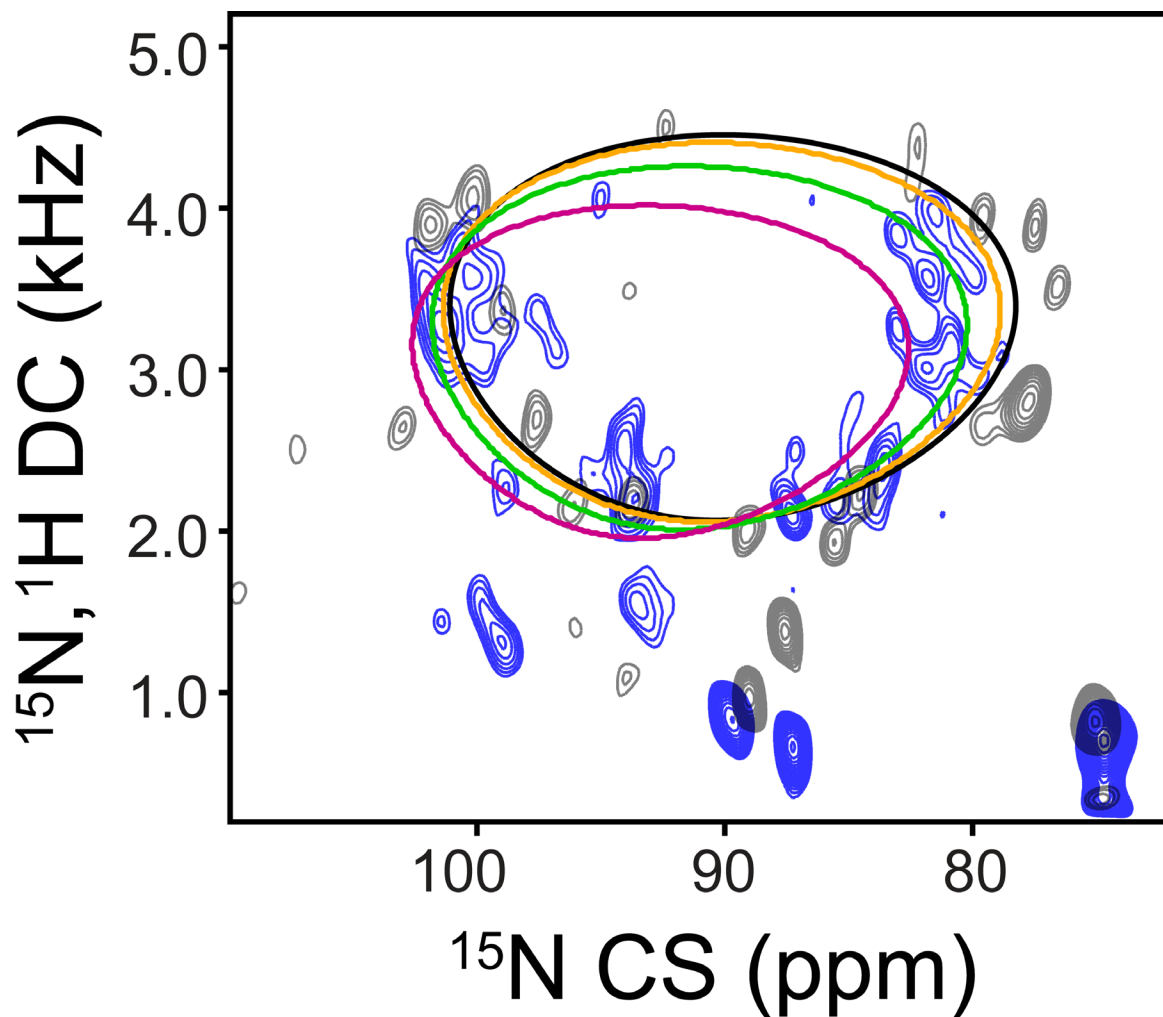

**Fig. S6. Simulated PISA wheels for wobbling motion of an ideal helix with tilt axis of  $\pm 0^\circ$  (black),  $\pm 5^\circ$  (yellow),  $\pm 10^\circ$  (green), and  $\pm 15^\circ$  (magenta) with respect to the bilayer normal. The spectrum of  $\text{SLN}^{\Delta Y29Q30Y31}$  (blue spectrum) is best fit with a simulated wheel having a wobbling amplitude  $\pm 10^\circ$ . In contrast, the  $\text{SLN}^{\text{wt}}$  (grey spectrum) is best fit with the simulated wheel without motion.**



**A*****SLN*<sup>ΔI3N4T5</sup>/*E1-SERCA* *SLN*<sup>ΔI3N4T5</sup>/*E2-SERCA***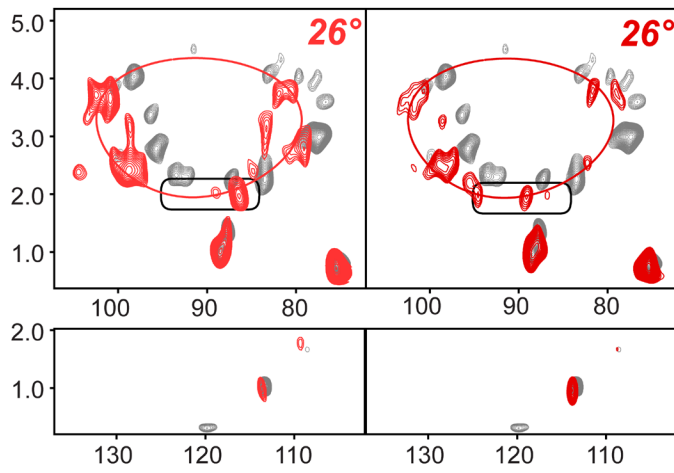**B*****SLN*<sup>ΔT5R6E7</sup>/*E1-SERCA* *SLN*<sup>ΔT5R6E7</sup>/*E2-SERCA***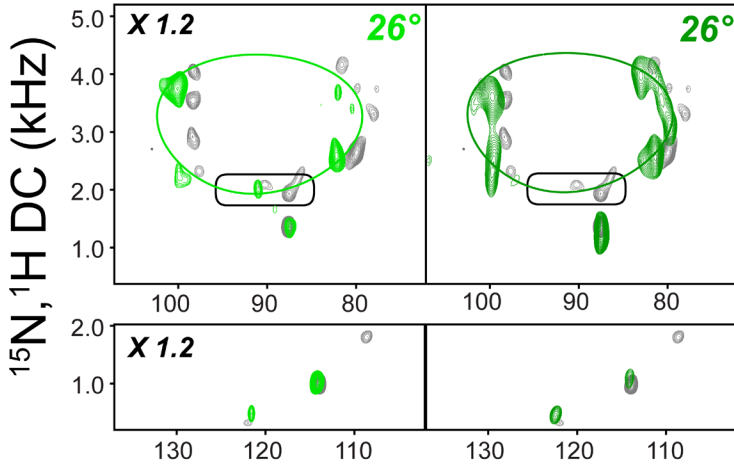**C*****SLN*<sup>ΔY29Q30Y31</sup>/*E1-SERCA* *SLN*<sup>ΔY29Q30Y31</sup>/*E2-SERCA***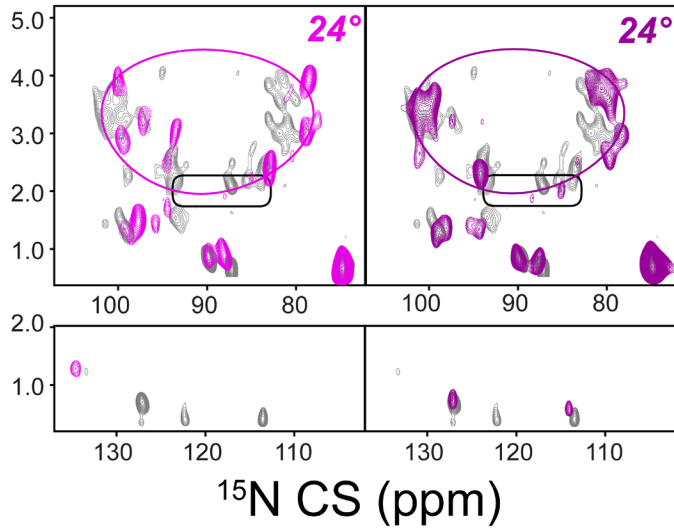

 *SLN/TM9-SERCA interface*

**Fig. S7. The hcSE-SAMPI4 spectra of A. SLN<sup>ΔI3N4T5</sup>, B. SLN<sup>ΔT5R6E7</sup>, and C. SLN<sup>ΔY29Q30Y31</sup> upon binding to the *E1*-SERCA (left) or the *E2*-SERCA (right). The hcSE-SAMPI4 spectra of free SLN<sup>ΔI3N4T5</sup>, SLN<sup>ΔT5R6E7</sup>, and SLN<sup>ΔY29Q30Y31</sup> are shown in gray for comparison. The lowest contour level is set as 5 times of the noise level for all spectra except the SLN<sup>ΔT5R6E7</sup>/*E1*-SERCA. In this case, the lowest contour level is set as 4.16 times of the noise level due to relatively low sensitivity. The black squares highlight the SLN/TM9-SERCA interface.**

**Table S1. The effect of truncations on SLN inhibitory function of SERCA.** Values for  $pK_{Ca}$  were obtained from a fitting of Hill equation using standard coupled enzymatic assays. Error was extracted from fitting. Values of HRR were obtained from four independent ITC titrations for each condition. Error was the standard deviation of the four measurements. The curves of coupled enzymatic assays and ITC titrations are shown in Fig. 2

|                                                          | $pK_{Ca}$ (I.U.) | HRR ( $\mu\text{J/s}$ ) |
|----------------------------------------------------------|------------------|-------------------------|
| SERCA                                                    | $6.76 \pm 0.03$  | $3.91 \pm 0.12$         |
| SERCA/SLN <sup>wt</sup>                                  | $6.58 \pm 0.02$  | $5.17 \pm 0.06$         |
| SERCA/SLN <sup><math>\Delta\text{I3N4T5}</math></sup>    | $6.62 \pm 0.02$  | $5.19 \pm 0.07$         |
| SERCA/SLN <sup><math>\Delta\text{T5R6E7}</math></sup>    | $6.73 \pm 0.03$  | $3.88 \pm 0.08$         |
| SERCA/SLN <sup><math>\Delta\text{Y29Q30Y31}</math></sup> | $6.72 \pm 0.03$  | $4.54 \pm 0.26$         |
| SERCA/SLN <sup><math>\Delta\text{Y31}</math></sup>       | $6.62 \pm 0.03$  | $4.97 \pm 0.05$         |
